# Supplementary material
Source: MDPI journal article supplement (https://www.mdpi.com/2311-7524/8/4/343)
Supplement: s1 [file s1]

**Table S1.** List of the primers used in this study.

| Primer    | Sequence (5'-3')              | Direction | Reference              | Target (gene) |
|-----------|-------------------------------|-----------|------------------------|---------------|
| D2A       | ACAAGTACCGTGAGGGAAAGTTG       | forward   | Nunn, 1992             | 28S           |
| 391F      | AGCGGAGGAAAAGAACT             | forward   | De Ley et al., 1994    | 28S           |
| D3B       | TCGGAAGGAACCAGCTACTA          | reverse   | Nunn, 1992             | 28S           |
| rDNA1.58S | ACGAGCCGAGTGATCCACCG          | forward   | Vrain et al., 1992     | ITS1          |
| rDNA2     | TTTCACTCGCCGTTACTAAGG         | reverse   | Vrain et al., 1992     | ITS1          |
| 988F      | CTCAAAGATTAAGCCATGC           | forward   | Holterman et al., 2006 | 18S           |
| 1813F     | CTGCGTGAGAGGTGAAAT            | forward   | Holterman et al., 2006 | 18S           |
| 1912R     | TTTACGGTCAGAACTAGGG           | reverse   | Holterman et al., 2006 | 18S           |
| 2646R     | GCTACCTTGTTACGACTTTT          | reverse   | Holterman et al., 2006 | 18S           |
| JB3       | TTTTTTGGGCATCCTGAGGTTTAT      | forward   | Bowles et al., 1992    | COI           |
| JB4.5     | AGCACCTAAACTTAAACATAATGAAAATG | reverse   | Bowles et al., 1992    | COI           |
| COIF      | GATTTTTTGGKCATCCWGARG         | forward   | He et al., 2005        | COI           |
| COIR      | CWACATAATAAGTATCATG           | reverse   | He et al., 2005        | COI           |
